# Supplementary material
Source: PubMed Central journal article supplement (PMC7561209)
Supplement: NIHMS1634110-supplement-sup_FigS1.pdf [file NIHMS1634110-supplement-sup_FigS1.pdf]

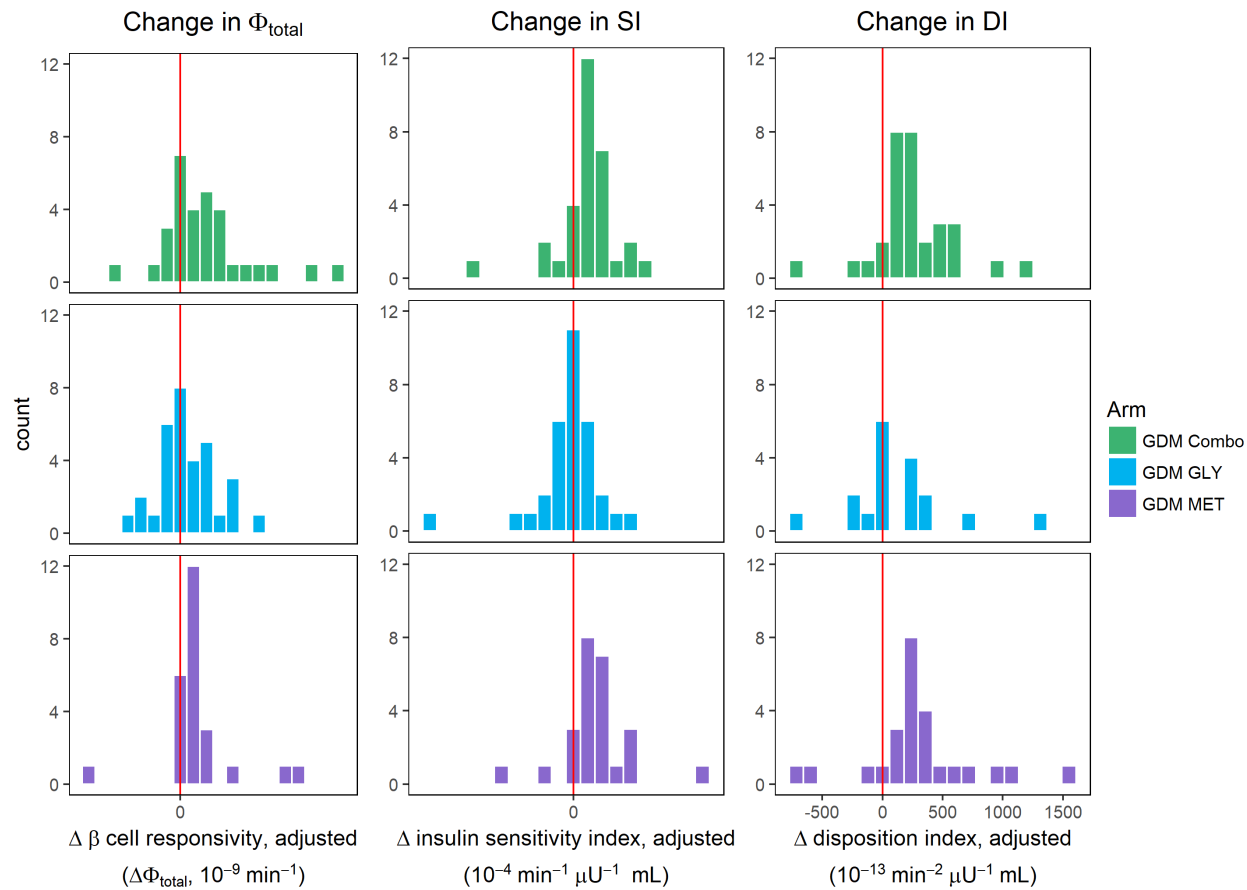

**Figure S1. Changes in pharmacodynamic parameters with drug treatment of GDM.** Histograms of the distribution of changes in total  $\beta$ -cell responsivity ( $\Phi_{total}$ ), SI, and DI for subjects receiving either COMBO (green), GLY (blue), or MET (purple) for the treatment of GDM adjusted for gestational age-dependent changes. Bar height indicates number of subjects. Zero, indicated with a vertical red line, represents no change.
