# Supplementary material
Source: PubMed Central journal article supplement (PMC7561209)
Supplement: NIHMS1634110-supplement-sup_FigS2.pdf [file NIHMS1634110-supplement-sup_FigS2.pdf]

# Glyburide Monotherapy

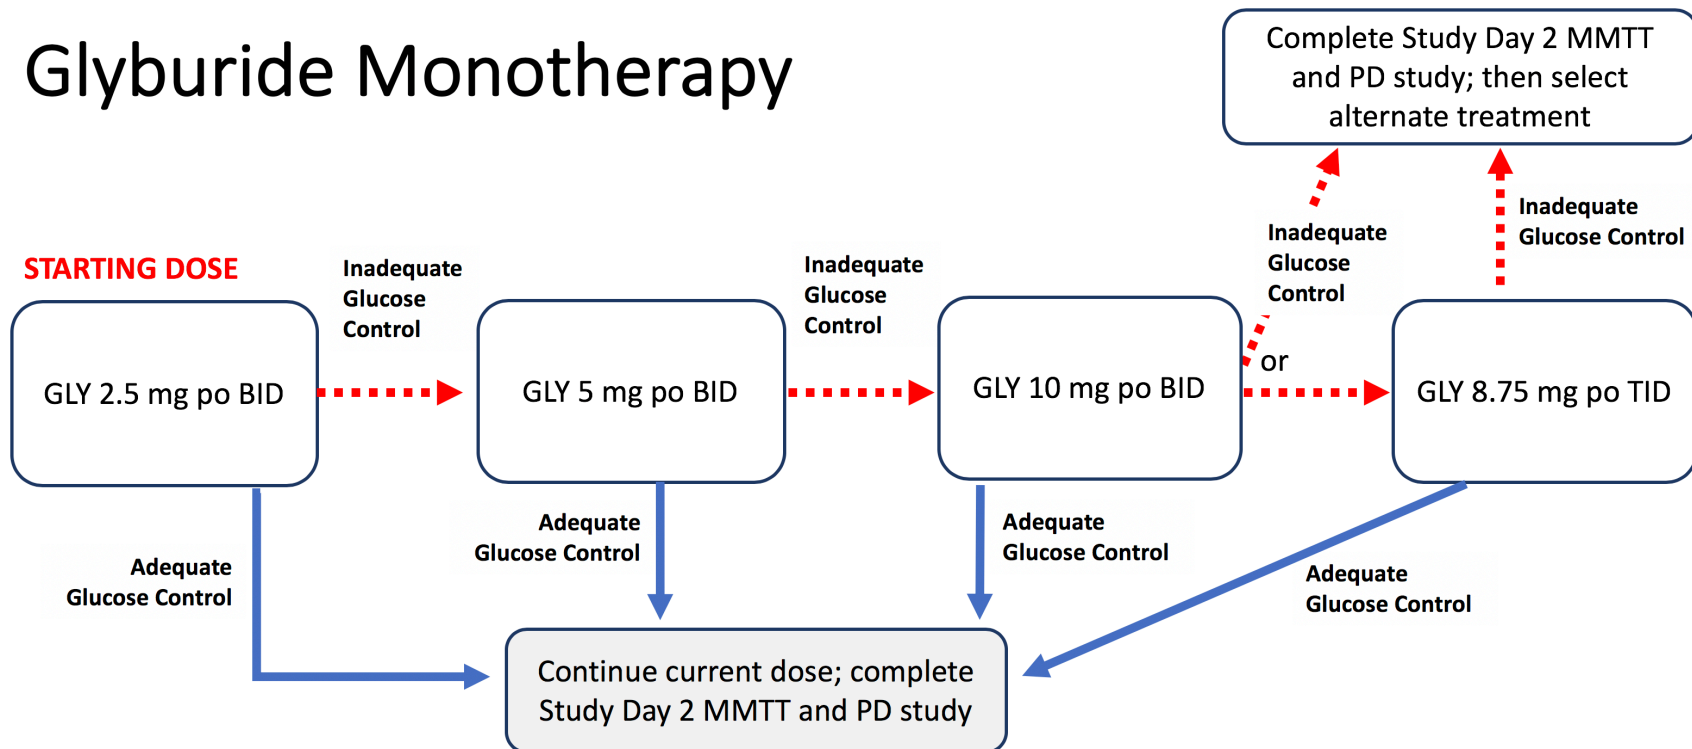

BID = twice daily; GLY = glyburide; MMTT = mixed-meal tolerance test; PD = pharmacodynamics; TID = three times a day

Provider's discretion may be used to start with a higher or lower dosage based on the clinical situation.

Inadequate glucose control defined as : >25% of fasting glucose >95 mg/dL or >25% of 1 hour postprandial glucose  $\geq$  140 mg/dL or 2 hour  $\geq$  120 mg/dL

Intolerable GI side effects and inadequate glucose control = treatment failure

**Figure S2. Glyburide Monotherapy Dosage Titration.** This figure depicts the study guide for glyburide monotherapy dosage titration. Starting dosage was glyburide 2.5 mg orally twice daily and was titrated as high as 8.75 mg orally three times daily. Provider's discretion was allowed. In addition, this figure depicts when SD2 MMTT should be completed. po = orally, bid = twice daily, tid = three time daily, PD = pharmacodynamic.
