# Supplementary material
Source: PubMed Central journal article supplement (PMC7561209)
Supplement: NIHMS1634110-supplement-sup_FigS3.pdf [file NIHMS1634110-supplement-sup_FigS3.pdf]

# Metformin Monotherapy

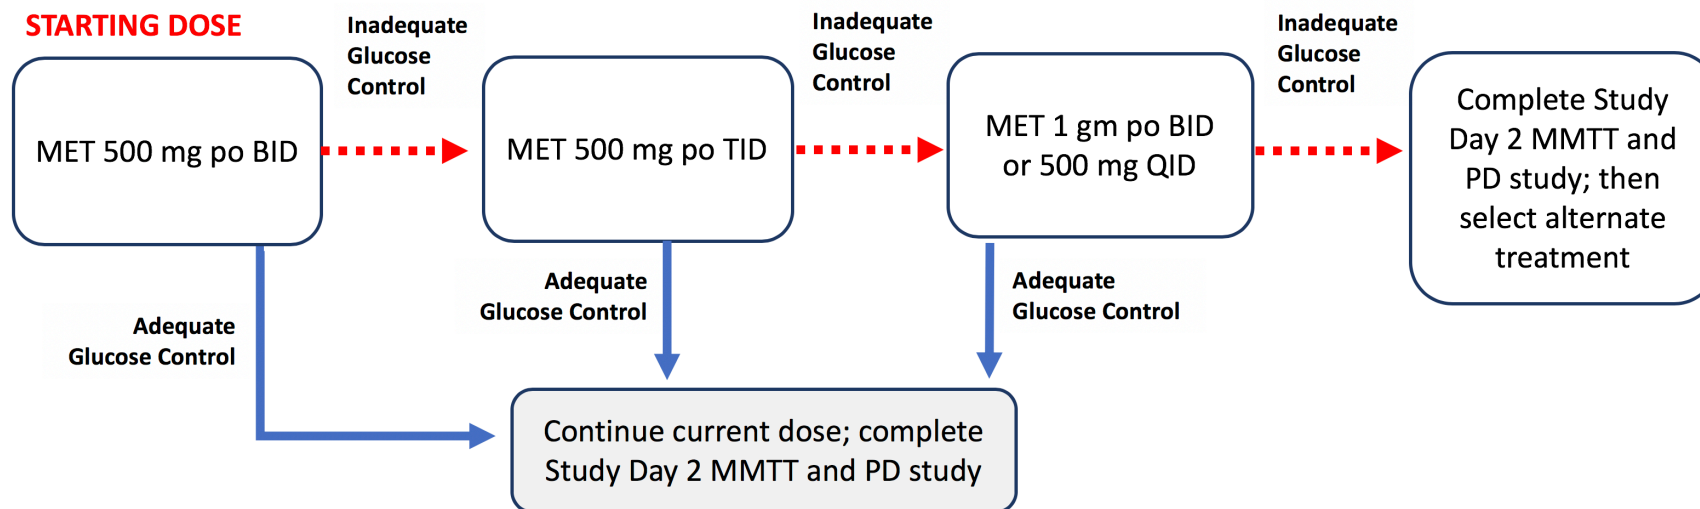

BID = twice daily; MET = Metformin; MMTT = mixed-meal tolerance test; QID = four times a day; PD = pharmacodynamics; TID = three times a day

Provider's discretion may be used to start with a higher or lower dosage based on the clinical situation.

Inadequate glucose control defined as : >25% of fasting glucose >95 mg/dL or >25% of 1 hour postprandial glucose  $\geq$  140 mg/dL or 2 hour  $\geq$  120 mg/dL

Intolerable GI side effects and inadequate glucose control = treatment failure

**Figure S3. Metformin Monotherapy Dosage Titration.** This figure depicts the study guide for metformin monotherapy dosage titration. Starting dosage was metformin 500 mg orally twice daily and was titrated as high as 2000 mg/day in divided doses. Provider's discretion was allowed. In addition, this figure depicts when study day 2 MMTT should be completed. po = orally, bid = twice daily, tid = three time daily, qid = four times daily, PD = pharmacodynamic.
