# Supplementary material
Source: PubMed Central journal article supplement (PMC7561209)
Supplement: NIHMS1634110-supplement-sup_FigS4.pdf [file NIHMS1634110-supplement-sup_FigS4.pdf]

# Glyburide-Metformin Combination Therapy

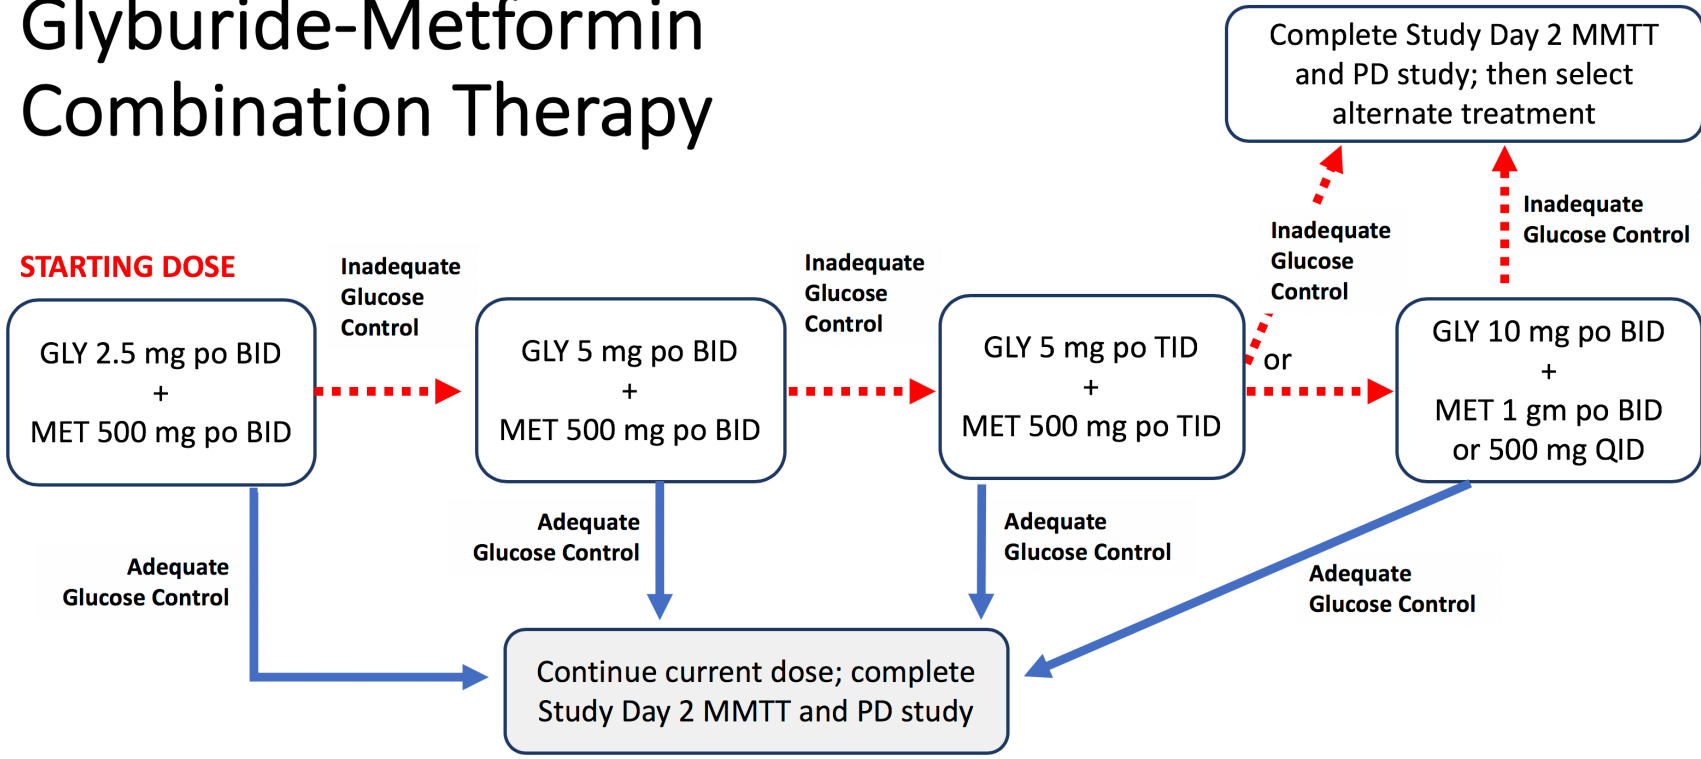

BID = twice daily; GLY = glyburide; MET = Metformin; MMTT = mixed-meal tolerance test; QID = four times a day; PD = pharmacodynamics; TID = three times a day

Provider's discretion may be used to start with a higher or lower dosage based on the clinical situation.

Inadequate glucose control defined as : >25% of fasting glucose >95 mg/dL or >25% of 1 hour postprandial glucose ≥ 140 mg/dL or 2 hour ≥ 120 mg/dL

Intolerable GI side effects and inadequate glucose control = treatment failure

**Figure S4. Glyburide and Metformin Combination Therapy Dosage Titration.** This figure depicts the study guide for glyburide and metformin dosage titration in the combination therapy group. Starting glyburide dosage was 2.5 mg orally twice daily and titrated as high as 10 mg orally twice daily. Starting metformin dosage was 500 mg orally twice daily and titrated as high as 2000 mg/day in divided doses. Provider's discretion was allowed. In addition, this figure depicts when study day 2 MMTT should be completed. po = orally, bid = twice daily, tid = three time daily, qid = four times daily, PD = pharmacodynamic.
